# Supplementary material for: Natural Polyphenols, 1,2,3,4,6-O-Pentagalloyglucose and Proanthocyanidins, as Broad-Spectrum Anticoronaviral Inhibitors Targeting Mpro and RdRp of SARS-CoV-2
Source: MDPI journal article supplement (doi:10.3390/biomedicines10051170), 2022-05-18
Supplement: s1 [file s1]

**Figure S1**

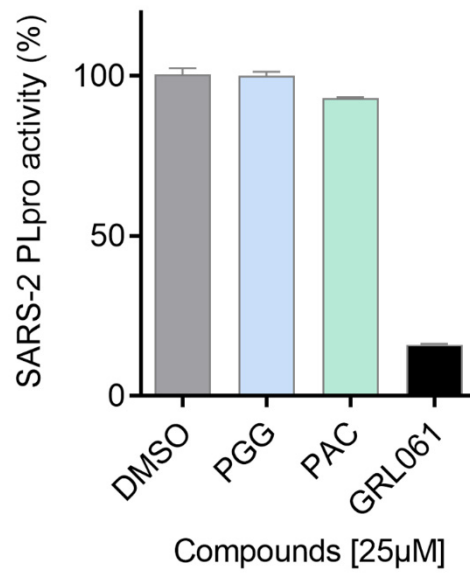

**Figure S1.** The effect of PGG and PAC on the SARS-CoV-2 PLpro activity. PGG and PAC (25 μM) did not affect the PLpro activity of SARS-CoV-2. GRL061 was used as a positive control.
